# Supplementary material
Source: PubMed Central journal article supplement (PMC3845145)
Supplement: 1313978110_pnas.201313978SI.pdf [file 1313978110_pnas.201313978SI.pdf]

# Supporting Information

Duman et al. 10.1073/pnas.1313978110

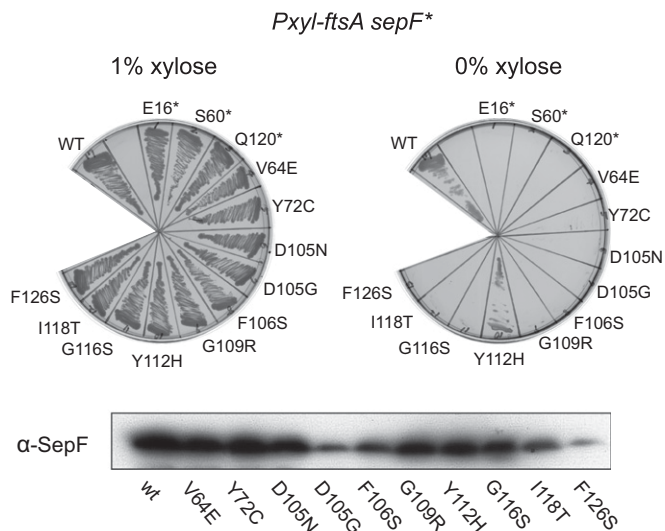

**Fig. S1.** Growth of *Bacillus subtilis* SepF mutants in the absence of FtsA. Selection of SepF mutant was based on impaired FtsZ interaction in a yeast two-hybrid screen (Fig. 1, main text). Wild-type *sepF* was substituted with mutant *sepF* genes (*sepF\**) in a strain containing *ftsA* under control of the xylose-inducible  $P_{xyI}$  promoter. If the SepF mutant is inactive, the protein cannot support growth of *B. subtilis* cells in the absence of FtsA (0% xylose). Western blot (Lower) shows expression levels of different SepF mutants in *B. subtilis*. We cannot rule out that the mutants D109G and F126S fail to complement wild-type SepF because of low expression levels.

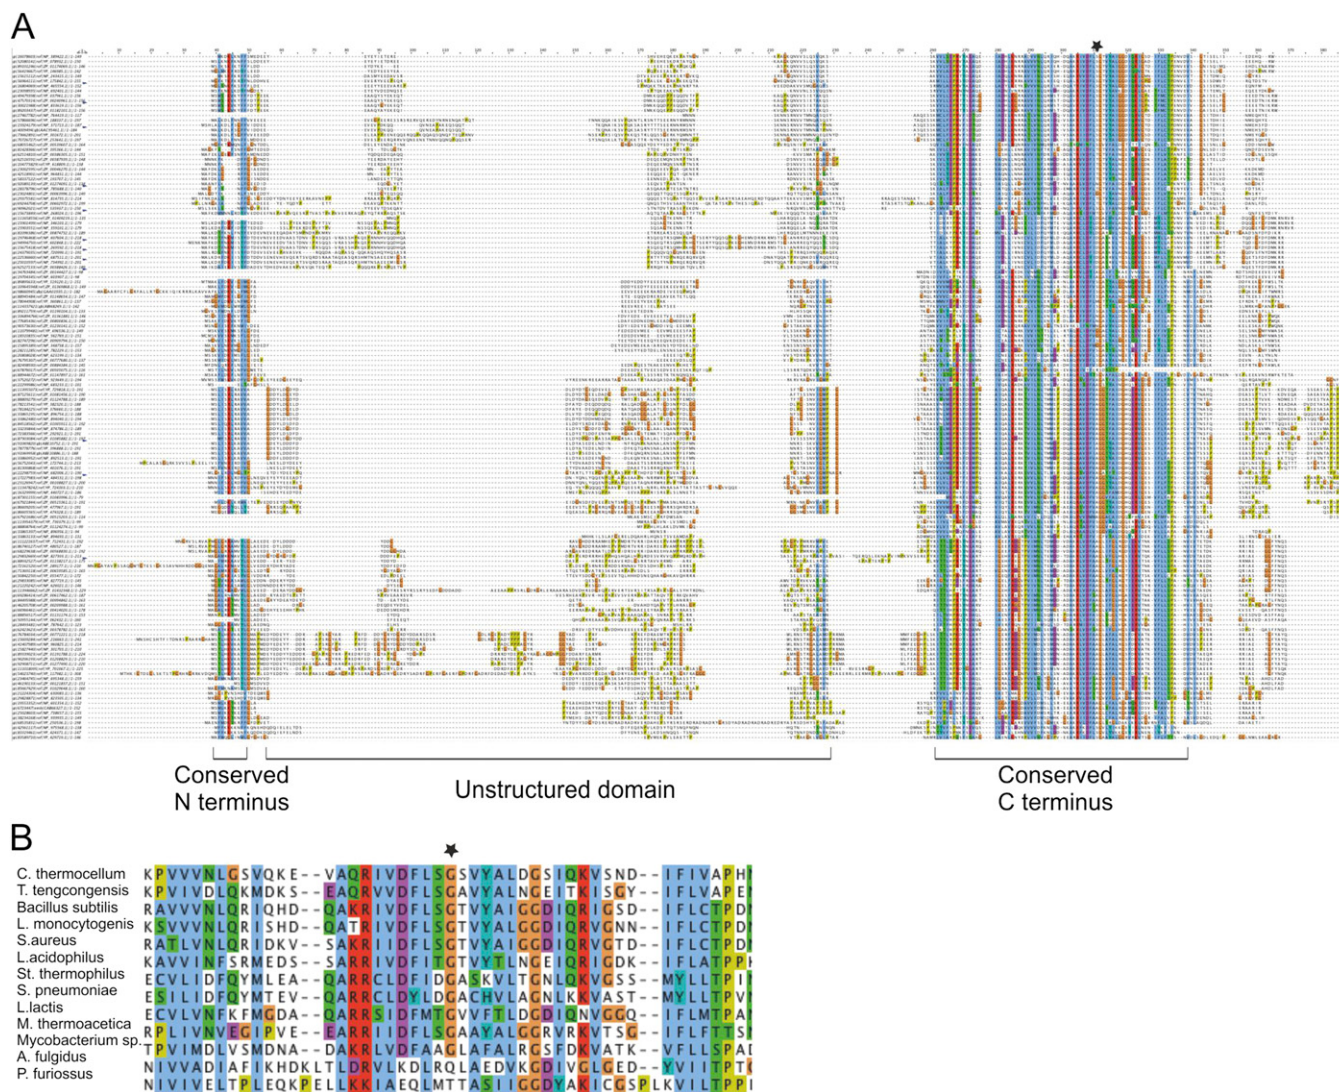

**Fig. S2.** (A) Sequence alignment of SepF-like proteins from 127 different organisms, using Clustal-W. *B. subtilis* SepF sequence is shown at the top. (B) Detail of the conserved C-terminal domain sequence containing the conserved glycine (G109) residue responsible for interdimer contacts (marked by a star).



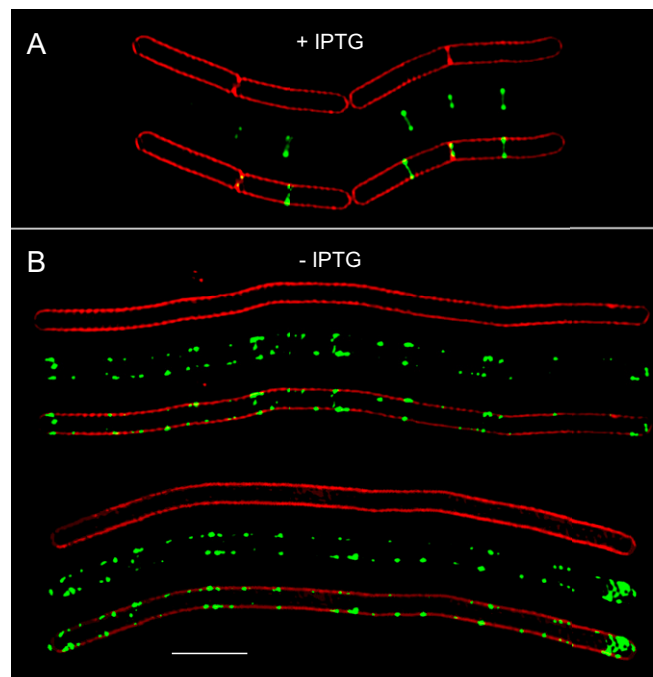

**Fig. S5.** SepF-GFP localizes close to the cell membrane. (A and B) Two-dimensional SIM images show SepF-GFP localization in (A) the presence (+IPTG) and (B) absence (–IPTG) of FtsZ in strain LH21 (*P<sub>xyI</sub>-sepF-gfp P<sub>spac</sub>-ftsZ*). Membranes were stained with FM-95 (red). SepF-GFP (green) was induced with xylose. (Scale bars, 3 μm.)

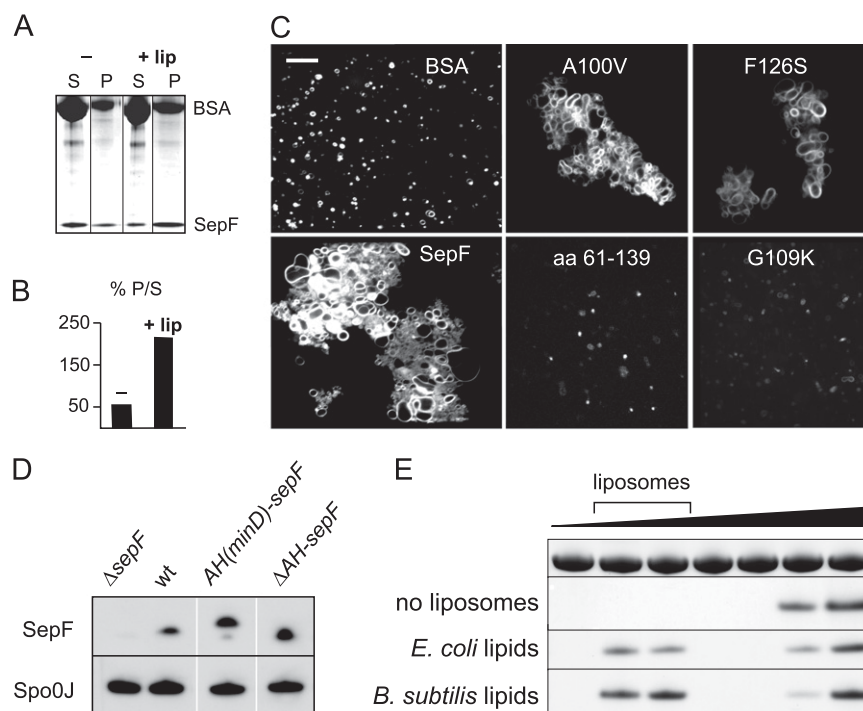

**Fig. S6.** SepF binds to lipid membranes. (A) Pelleting assay with SepF in the absence (–) and presence of liposomes (+ lip). BSA is present to reduce nonspecific interactions. This is a discontinuous image from the same gel. Supernatant (S) and pellet (P) were analyzed using SDS/PAGE. (B) Ratios of pelleted SepF (P/S) from A. (C) SepF causes liposomes to aggregate. The presence of large liposomes suggests that some liposomes fuse due to the presence of SepF. SepF mutants amino acids 61–139, G109K, ΔN13, and FL7D did not induce liposome clustering (ΔN13 and L7D gave the same result as amino acids 61–139 and G109K and are not shown). Liposomes were stained with Bodipy FL C16, and images were taken with a spinning-disk confocal microscope. (Scale bar, 10 μm.) (D) Western blot showing that the AH(MinD)-SepF and ΔAH-SepF (lacking first 13 aa) mutants are stable (WT, wild-type strain). Immunodetection of Spo0J was used as a loading control. This is a discontinuous image from the same blot. (E) Flotation assay using sucrose density gradient (main text), confirming that SepF also binds to liposomes made from *B. subtilis* lipid extract.

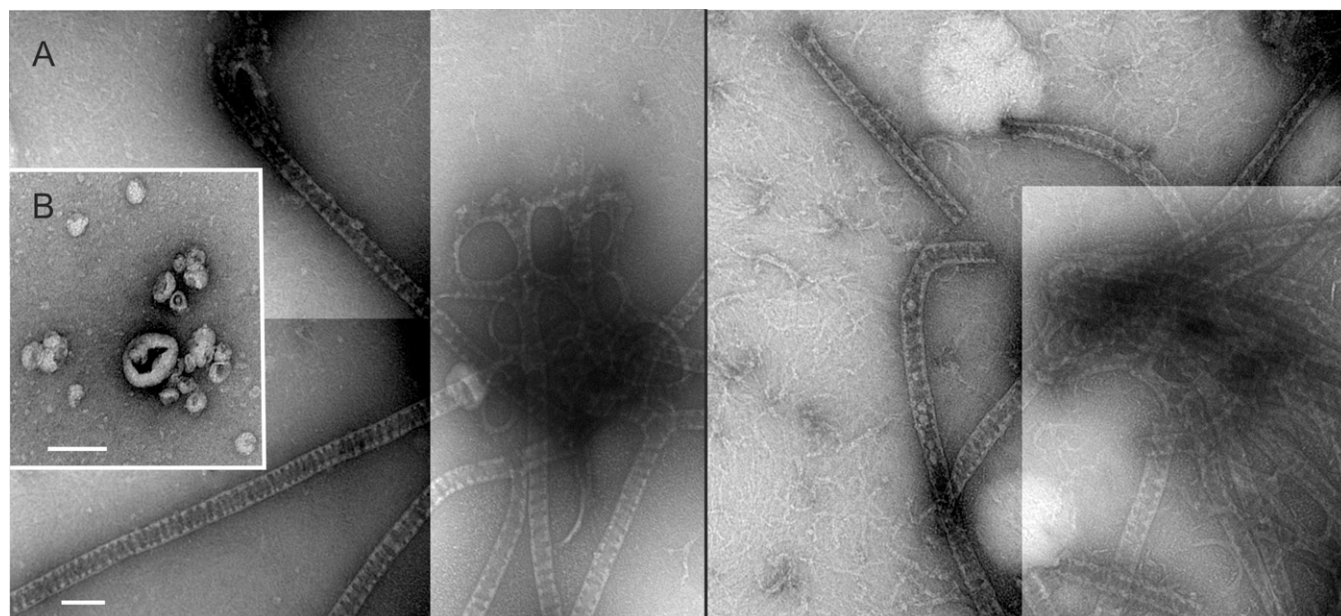

**Fig. 57.** Liposomes stimulate the formation of FtsZ-SepF tubules. (A) EM images of FtsZ-SepF tubules that are formed when purified FtsZ and SepF are mixed with liposomes. Polymerization of FtsZ is initiated by the addition of GTP. (B) Liposomes without protein. Liposomes were made from *Escherichia coli* polar lipid extract. (Scale bars, 100 nm.)

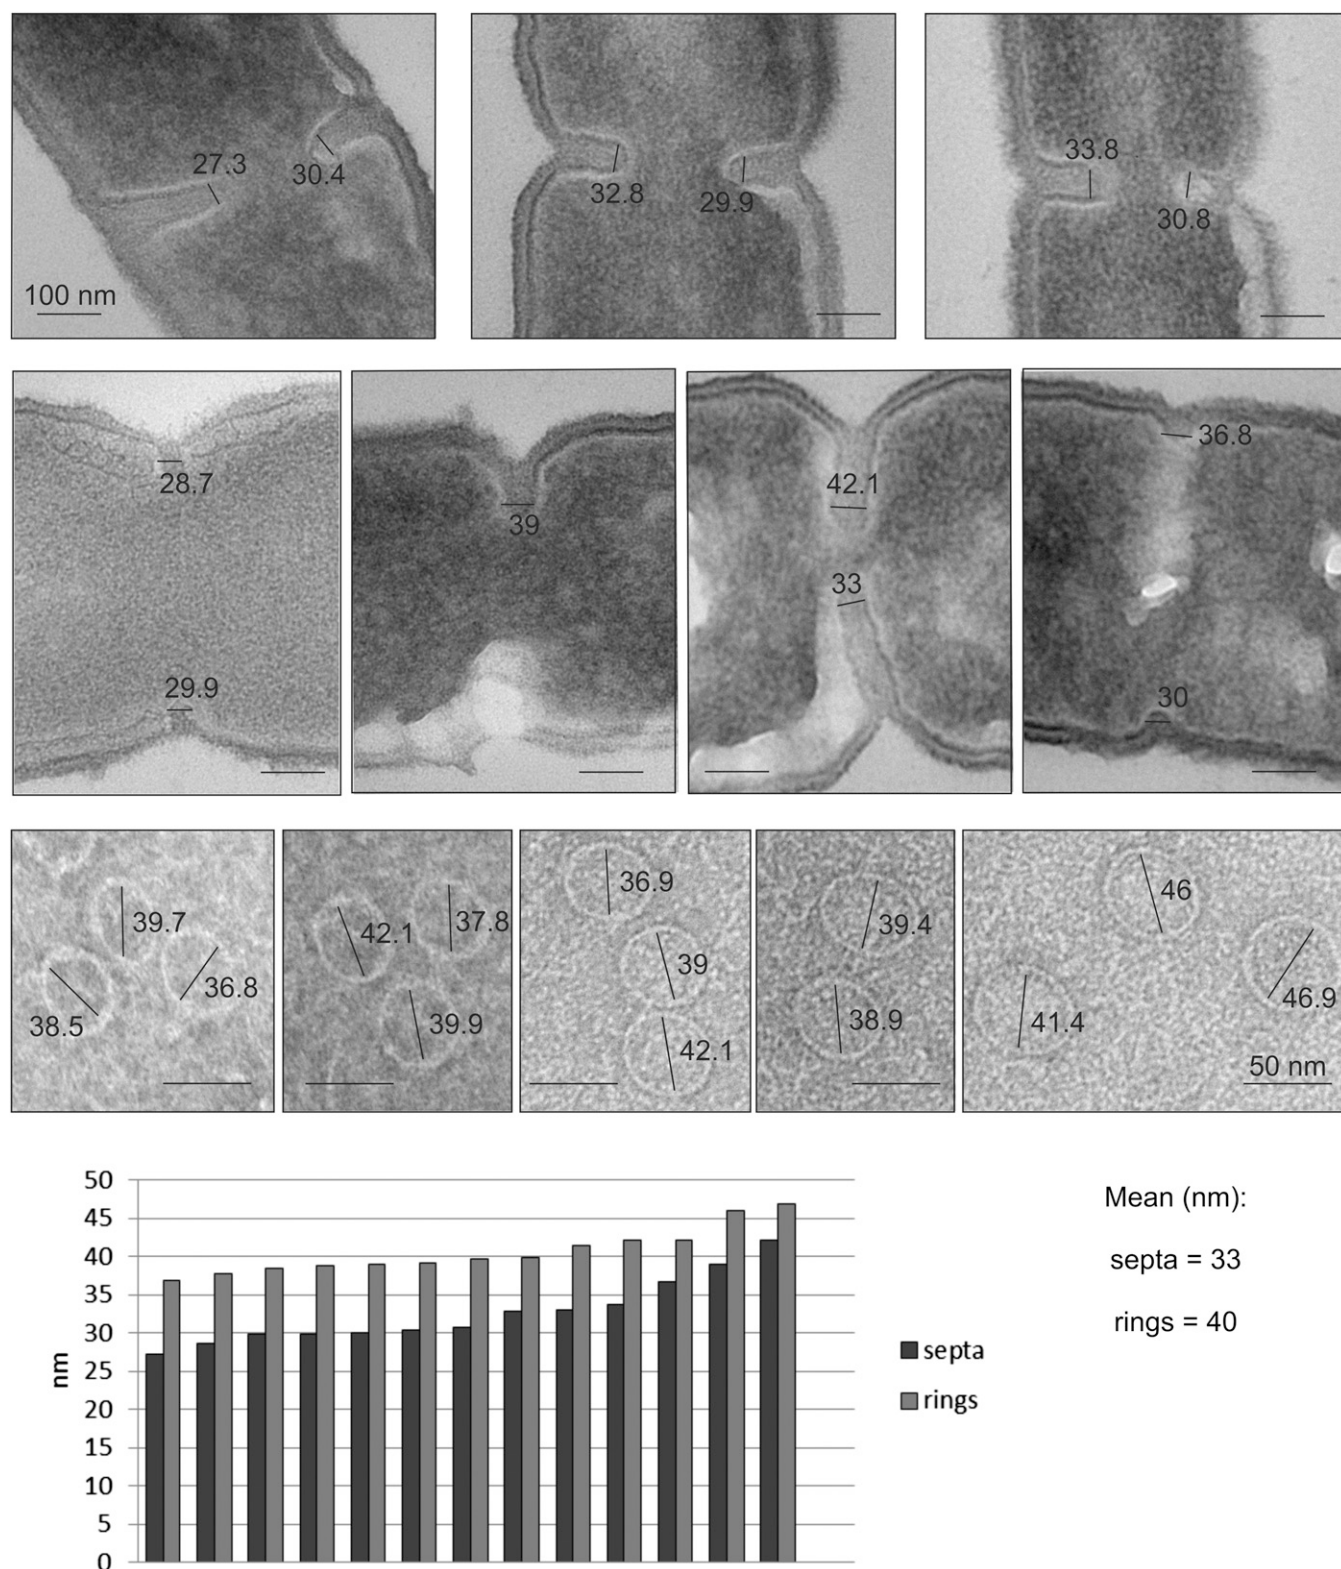

**Fig. S8.** Transmission EM images of dividing *B. subtilis* cells used for septum width measurements and SepF rings used to measure the inner diameter of the rings. The measured values are ordered in the bar diagram.

| Statistics                       | <i>Archaeoglobus fulgidus</i>                 | <i>Pyrococcus furiosus</i>                                       | <i>Bacillus subtilis</i>                     | <i>B. subtilis</i>                     |
|----------------------------------|-----------------------------------------------|------------------------------------------------------------------|----------------------------------------------|----------------------------------------|
| Protein                          | II05M, SeMet                                  | SeMet                                                            | BsSepF-C NATI                                | BsSepF-C G109K                         |
| UniProt IDs                      | NP_069616                                     | YP_006493105                                                     | SEPF_BACSU                                   | SEPF_BACSU                             |
| Data collection                  |                                               |                                                                  |                                              |                                        |
| Beamline                         | ESRF ID23eh1                                  | ESRF ID23eh1                                                     | ESRF ID29                                    | ESRF ID23eh1                           |
| Wavelengths, Å                   | 0.9793; 0.9798                                | 0.9793; 0.9798                                                   | 0.9762                                       | 0.9000                                 |
| Method crystal                   | SeMet MAD                                     | SeMet MAD                                                        | MR with <i>Pf</i>                            | MR with BsSepF-C                       |
| Space group                      | P2 <sub>1</sub> 2 <sub>1</sub> 2 <sub>1</sub> | P6 <sub>5</sub> 22                                               | P3 <sub>2</sub> 21                           | C222 <sub>1</sub>                      |
| Cell, Å                          | 107.0, 64.1, 82.6                             | 59.3, 59.3, 177.5                                                | 40.6, 40.6, 170.3                            | 42.0, 80.1, 51.8                       |
| Scaling                          |                                               |                                                                  |                                              |                                        |
| Resolution, Å                    | 2.0                                           | 2.5                                                              | 1.9                                          | 2.2                                    |
| Completeness, %*                 | 99.9 (99.9)                                   | 99.9 (99.9)                                                      | 99.9 (99.9)                                  | 100 (100)                              |
| Multiplicity*                    | 14.0 (14.5)                                   | 26.2 (25.8)                                                      | 9.6 (8.6)                                    | 6.8 (7.0)                              |
| (I)/σ(I)*                        | 28.7 (21.6)                                   | 31.1 (14.6)                                                      | 14.5 (4.5)                                   | 8.8 (4.5)                              |
| R <sub>merge</sub> *             | 0.072 (0.110)                                 | 0.077 (0.230)                                                    | 0.092 (0.415)                                | 0.14 (0.40)                            |
| R <sub>pim</sub> *               | 0.029 (0.043)                                 | 0.020 (0.063)                                                    | 0.032 (0.148)                                | 0.062 (0.164)                          |
| Refinement                       |                                               |                                                                  |                                              |                                        |
| R/R <sub>free</sub> <sup>†</sup> | 0.188 (0.244)                                 | 0.219 (0.289)                                                    | 0.184 (0.246)                                | 0.194 (0.245)                          |
| Model                            | 3 dimers: 37–121; 372 H <sub>2</sub> O        | 2 monomers packing as dimer: 49–130; 46–129; 29 H <sub>2</sub> O | 1 dimer: 61–139; 61–140; 59 H <sub>2</sub> O | 1 monomer: 61–142; 30 H <sub>2</sub> O |
| Bond length rmsd, Å              | 0.025                                         | 0.008                                                            | 0.024                                        | 0.007                                  |
| Bond angle rmsd, °               | 2.055                                         | 0.973                                                            | 1.815                                        | 0.947                                  |
| Most favored, % <sup>‡</sup>     | 97.3                                          | 91.6                                                             | 93.6                                         | 100                                    |
| Disallowed, % <sup>‡</sup>       | 0.0                                           | 0.0                                                              | 0.0                                          | 0.0                                    |
| PDB ID                           | 3ZIE                                          | 3ZIG                                                             | 3ZIH                                         | 3ZII                                   |

\*Values in parentheses refer to the highest recorded resolution shell.

Table S2. Strains and plasmids

| Name            | Relevant genotype                                                                                                                       | Source                        |
|-----------------|-----------------------------------------------------------------------------------------------------------------------------------------|-------------------------------|
| Strain          |                                                                                                                                         |                               |
| 168             | <i>trpC2</i>                                                                                                                            | Laboratory stock              |
| LH21            | <i>amy::Pxyl-sepF-gfp Spc, Pspac-ftsZ ble</i>                                                                                           | Same as strain 4182 in ref. 1 |
| YK012           | CRK6000, <i>ezrA::spec</i>                                                                                                              | (2)                           |
| YK204           | CRK6000, $\Delta$ <i>sepF::spec</i>                                                                                                     | (3)                           |
| YK206           | CRK6000, $\Delta$ <i>ftsA::erm-Pspac-ftsZ</i> ( $\Delta$ <i>ftsA::erm</i> )                                                             | (3)                           |
| MD120           | <i>ezrA::spec</i>                                                                                                                       | S. Ishikawa                   |
| MD136           | $\Delta$ <i>ftsA::erm-Pspac-ftsZ</i> ( $\Delta$ <i>ftsA::erm</i> )                                                                      | S. Ishikawa                   |
| MD172           | <i>amyE::Pxyl-ftsA</i> ( <i>Pxyl-ftsA</i> )                                                                                             | S. Ishikawa                   |
| MD175           | $\Delta$ <i>ftsA::erm Pxyl-ftsA</i>                                                                                                     | S. Ishikawa                   |
| MD194           | $\Delta$ <i>sepF::spec</i>                                                                                                              | S. Ishikawa                   |
| MD197           | <i>ftsA::erm Pxyl-ftsA</i> $\Delta$ <i>sepF::spec</i>                                                                                   | S. Ishikawa                   |
| SD261           | <i>sepF-E16*-cat</i>                                                                                                                    | This study                    |
| SD264           | <i>sepF-K60*-cat</i>                                                                                                                    | This study                    |
| SD269           | <i>sepF-R120*-cat</i>                                                                                                                   | This study                    |
| SD270           | <i>sepF-V64E-cat</i>                                                                                                                    | This study                    |
| SD271           | <i>sepF-Y72C-cat</i>                                                                                                                    | This study                    |
| SD272           | <i>sepF-D105N-cat</i>                                                                                                                   | This study                    |
| SD273           | <i>sepF-D105G-cat</i>                                                                                                                   | This study                    |
| SD274           | <i>sepF-F106S-cat</i>                                                                                                                   | This study                    |
| SD275           | <i>sepF-G109R-cat</i>                                                                                                                   | This study                    |
| SD276           | <i>sepF-Y112H-cat</i>                                                                                                                   | This study                    |
| SD277           | <i>sepF-G116S-cat</i>                                                                                                                   | This study                    |
| SD278           | <i>sepF-I118T-cat</i>                                                                                                                   | This study                    |
| SD279           | <i>sepF-F126S-cat</i>                                                                                                                   | This study                    |
| SD283           | <i>sepF-wild-cat</i>                                                                                                                    | This study                    |
| SD331           | $\Delta$ <i>ftsA::erm Pxyl-ftsA sepF-E16*-cat</i>                                                                                       | This study                    |
| SD332           | $\Delta$ <i>ftsA::erm Pxyl-ftsA sepF-K60*-cat</i>                                                                                       | This study                    |
| SD333           | $\Delta$ <i>ftsA::erm Pxyl-ftsA sepF-R120*-cat</i>                                                                                      | This study                    |
| SD334           | $\Delta$ <i>ftsA::erm Pxyl-ftsA sepF-V64E-cat</i>                                                                                       | This study                    |
| SD335           | $\Delta$ <i>ftsA::erm Pxyl-ftsA sepF-Y72C-cat</i>                                                                                       | This study                    |
| SD336           | $\Delta$ <i>ftsA::erm Pxyl-ftsA sepF-D105N-cat</i>                                                                                      | This study                    |
| SD337           | $\Delta$ <i>ftsA::erm Pxyl-ftsA sepF-D105G-cat</i>                                                                                      | This study                    |
| SD338           | $\Delta$ <i>ftsA::erm Pxyl-ftsA sepF-F106S-cat</i>                                                                                      | This study                    |
| SD339           | $\Delta$ <i>ftsA::erm Pxyl-ftsA sepF-G109R-cat</i>                                                                                      | This study                    |
| SD340           | $\Delta$ <i>ftsA::erm Pxyl-ftsA sepF-Y112H-cat</i>                                                                                      | This study                    |
| SD341           | $\Delta$ <i>ftsA::erm Pxyl-ftsA sepF-G116S-cat</i>                                                                                      | This study                    |
| SD342           | $\Delta$ <i>ftsA::erm Pxyl-ftsA sepF-I118T-cat</i>                                                                                      | This study                    |
| SD343           | $\Delta$ <i>ftsA::erm Pxyl-ftsA sepF-F126S-cat</i>                                                                                      | This study                    |
| SD347           | $\Delta$ <i>ftsA::erm Pxyl-ftsA sepF-wild-cat</i>                                                                                       | This study                    |
| HS206           | <i>amyE::spec Pxyl-sepF1-39</i> (SepF1-13)- <i>gfp</i>                                                                                  | This study                    |
| HS207           | <i>amyE::spec Pxyl-sepF1-75</i> (SepF1-25)- <i>gfp</i>                                                                                  | This study                    |
| HS208           | <i>amyE::spec Pxyl-sepF1-75</i> (SepF1-25)- <i>junLZ-gfp</i>                                                                            | This study                    |
| HS223           | <i>amyE::spec Pxyl-sepF1-39</i> (SepF1-13, L7D)- <i>gfp</i>                                                                             | This study                    |
| NC21            | <i>sepF::ery amy::spec Pxyl-sepF</i> (G109K)- <i>gfp</i>                                                                                | This study                    |
| NC40            | <i>sepF::neo</i>                                                                                                                        | This study                    |
| HS230           | <i>aprE::spc Pxyl-SepF<math>\Delta</math><sub>AH</sub></i> (SepF $\Delta$ 2-13)                                                         | This study                    |
| HS232           | <i>aprE::spc Pxyl-AH<sub>MinD</sub>-sepF</i> (MinD <sub>248-268</sub> -SepF <sub>14-151</sub> )                                         | This study                    |
| HS242           | <i>sepF::neo</i> $\Delta$ <i>ftsA::erm aprE::spc Pxyl-AH<sub>MinD</sub>-sepF</i> (MinD <sub>248-268aa</sub> -SepF <sub>14-151aa</sub> ) | This study                    |
| Plasmids        |                                                                                                                                         |                               |
| pMAL-C2         | <i>Ptac, bla, ColE1, malE, lacZ<math>\alpha</math>, lacI<sup>q</sup></i>                                                                | New England Biolabs           |
| pNC12           | <i>Ptac-malE-sepF</i>                                                                                                                   | This work                     |
| pMBP-SepF A100V | <i>Ptac-malE-sepF</i> (A100V)                                                                                                           | (4)                           |
| pMBP-SepF F126S | <i>Ptac-malE-sepF</i> (F126S)                                                                                                           | (4)                           |
| pNC13           | <i>Ptac-malE-sepF</i> (G109K)                                                                                                           | This work                     |
| pHJS106         | <i>Ptac-malE-sepF<math>\Delta</math>N13</i> (SepF14-151)                                                                                | This work                     |
| pHJS107         | <i>Ptac-malE-sepF</i> (SepF L7D)                                                                                                        | This work                     |
| pNC14           | <i>bla spec amyE3' Pxyl-sepF</i> (G109K)- <i>gfp amyE5'</i>                                                                             | This work                     |
| pSG1154         | <i>bla spec amyE3' Pxyl-gfp amyE5'</i>                                                                                                  | (5)                           |
| pTS37           | <i>cat gfp-junLZ-EcMTS256-270</i>                                                                                                       | (6)                           |
| pHJS108         | <i>bla spec amyE3' Pxyl-sepF1-39-gfp amyE5'</i>                                                                                         | This work                     |
| pHJS109         | <i>bla spec amyE3' Pxyl-sepF1-75-gfp amyE5'</i>                                                                                         | This work                     |
| pHJS110         | <i>bla spec amyE3' Pxyl-sepF1-75-junLZ-gfp amyE5'</i>                                                                                   | This work                     |
| pHJS111         | <i>bla spec amyE3' Pxyl-sepF1-39</i> (L7D)- <i>gfp amyE5'</i>                                                                           | This work                     |

1. Hamoen LW, Meile JC, de Jong W, Noirot P, Errington J (2006) SepF, a novel FtsZ-interacting protein required for a late step in cell division. *Mol Microbiol* 59(3):989–999.
2. Kawai Y, Ogasawara N (2006) *Bacillus subtilis* EzrA and FtsL synergistically regulate FtsZ ring dynamics during cell division. *Microbiology* 152(Pt 4):1129–1141.
3. Ishikawa S, Kawai Y, Hiramatsu K, Kuwano M, Ogasawara N (2006) A new FtsZ-interacting protein, YlmF, complements the activity of FtsA during progression of cell division in *Bacillus subtilis*. *Mol Microbiol* 60(6):1364–1380.
4. Gündoğdu ME, et al. (2011) Large ring polymers align FtsZ polymers for normal septum formation. *EMBO J* 30(3):617–626.
5. Lewis PJ, Marston AL (1999) GFP vectors for controlled expression and dual labelling of protein fusions in *Bacillus subtilis*. *Gene* 227(1):101–110.
6. Szeto TH, Rowland SL, Habrukowich CL, King GF (2003) The MinD membrane targeting sequence is a transplantable lipid-binding helix. *J Biol Chem* 278(41):40050–40056.

**Table S3. Oligonucleotides**

| Name                   | Information                 | Sequence                                                                                                     |
|------------------------|-----------------------------|--------------------------------------------------------------------------------------------------------------|
| inc22                  | $\Delta N(14-151)$ F        | GTTGCCCGGGGAAGATGAAGAATAC                                                                                    |
| inc6                   | $\Delta N(14-151)$ R        | GACTCTAGATTACCACCTCTGATGTTT                                                                                  |
| HS492                  | L7D F                       | GAGTATGAAAAATAAAGACAAAAACTTTTTCTCAATG                                                                        |
| HS493                  | L7D R                       | CATTGAGAAAAAGTTTTGTCTTTATTTTCATACTC                                                                          |
| inc40                  | G109K F                     | GACTTTTAAAGCAACACCGTTTATG                                                                                    |
| inc41                  | G109K R                     | CATAAACGGTGTGCTTAAAAAGTC                                                                                     |
| sepFgwR                |                             | agaaagctgggtcTTACCACCTCTGATGTTCTG                                                                            |
| sepF- $\Delta N1$ -gwF |                             | aaaaagcaggctcgCCGGCTTACAACGGGAATAAAC                                                                         |
| sepF- $\Delta N2$ -gwF |                             | aaaaagcaggctcgAAAGTGGTGTGAGTGAGCC                                                                            |
| sepF- $\Delta N3$ -gwF |                             | aaaaagcaggctcgCCTGACAACGTAGATGTATCAGG                                                                        |
| Adapter-attB1          |                             | Ggggacaagttgtacaaaaagcaggctcg                                                                                |
| Adapter-attB2          |                             | Ggggaccactttgtacaagaagctgggtc                                                                                |
| pDONR-F                |                             | TCGCGTTAACGCTAGCATGGATCTC                                                                                    |
| pDONR-R                |                             | GTAACATCAGAGATTTTGAGACAC                                                                                     |
| sepF-mutF-f            |                             | ACAGGAATTGATGAAAGGGAATCCG                                                                                    |
| sepF-mutF-r2           |                             | CTTCCATTGAGAAAAAGTTTTTCAG                                                                                    |
| sepF-mutIn-f2          |                             | CTGAAAACTTTTTCTCAATGGAAG                                                                                     |
| pGBT9-mutIn-r          |                             | gctcttctgggtgagctatccGGCTGCAGGTCGACGGAATC                                                                    |
| rPCR-CmF2              |                             | ggatagactccaccagaagagcATCATCGGCAATAGTTACCC                                                                   |
| rPCR-CmR(-ter)         |                             | ccaggatgtagtatccttcgTTATAAAAGCCAGTCATTAGGCC                                                                  |
| ylmG-rPCR-f            |                             | CGGAAGGATACTACATCCTGG-AGAGGTGGTAAAGCGAGATG                                                                   |
| sepF-mutB-r            |                             | TCCCGTAACAGCAGAGAGGATGACC                                                                                    |
| HS09                   | pSG1154 R                   | CATCTAGGAATCTCCTTTCTAG                                                                                       |
| HS479                  | pSG1154 F                   | AGCGGCTCAGGATCCATGAGTAAAGGAGAAGAACTTTTCAC                                                                    |
| HS478                  | SepF F                      | GAGATTCCTAGGATGAGTATGAAAAATAAACTGAAAACTTTTTTC                                                                |
| HS480                  | N13 R                       | GGATCCTGAGCCGCTTCCTGACATTGAGAAAAAGTTTTTCAGTTTTTTTC                                                           |
| HS481                  | N25 R                       | GGATCCTGAGCCGCTTCCTGATGTCTCAATATATTCATATTCGTATTC                                                             |
| HS484                  | JunLZ F                     | GCGCGGGATCCGGTGGTCTGATCGCTCGTCTG                                                                             |
| HS485                  | JunLZ R                     | CGCGCGGATCCTGAGCCGCTTCGTTTCATAACTTTCTGTTTCAGCTG                                                              |
| HS495                  | Pxyl F                      | AATTCGTCTCCCGGCCCTTCAAAGCCTGTGCGGAATTG                                                                       |
| HS497                  | Pxyl( $\Delta 2-13$ ) R     | AATTCGTCTCTCCATCCTAGGAATCTCCTTTCTAGATG                                                                       |
| HS498                  | Pxyl(AH <sub>MinD</sub> ) R | AATTCGTCTCACCATCCTAGGAATCTCCTTTCTAGATG                                                                       |
| HS501                  | SepF( $\Delta 2-13$ ) F     | AATTCGTCTCTATGGAAGATGAAGAATACGAATATGAATATATTG                                                                |
| HS503                  | SepF(AH <sub>MinD</sub> ) F | AATTCGTCTCTATGGTGCTTGAAGAGCAAAACAAAGGAA<br>TGATGGCTAAGATTAAGTCATTTTTTCGGAGTAAGATCTGA<br>AGATGAAGAATACGAATATG |
| HS500                  | SepF R                      | AATTCGTCTCCCCAATTACCACCTCTGATGTTCTG                                                                          |

Tag sequence for adapter and recombinant PCR is shown in lowercase.
